# Supplementary material for: Rapid and Portable Detection of Hg and Cd in Grain Samples Based on Novel Catalytic Pyrolysis Composite Trap Coupled with Miniature Atomic Absorption Spectrometry
Source: MDPI journal article supplement (doi:10.3390/foods12091778), 2023-04-25
Supplement: s1 [file s1]

**Rapid and portable detection of Hg and Cd in grain samples based on novel catalytic pyrolysis composite trap coupled with miniature atomic absorption spectrometry**

Tengpeng Liu <sup>1</sup>, Jixin Liu <sup>2,\*</sup>, Xuefei Mao <sup>1,\*</sup>, Xiaoming Jiang <sup>3</sup>, Yabo Zhao <sup>2</sup> and Yongzhong Qian <sup>1</sup>

<sup>1</sup> Institute of Quality Standard and Testing Technology for Agro-products, Chinese Academy of Agricultural Sciences, and Key Laboratory of Agro-food Safety and Quality, Ministry of Agriculture and Rural Affairs, Beijing 100081, China

<sup>2</sup> Beijing Ability Technology Co., Ltd., Beijing 100081, China

<sup>3</sup> Analytical & Testing Center, Sichuan University, Chengdu 610064, China

\* Correspondence: ljx2117@gmail.com (J.L.); maoxuefei@caas.cn (X.M.)

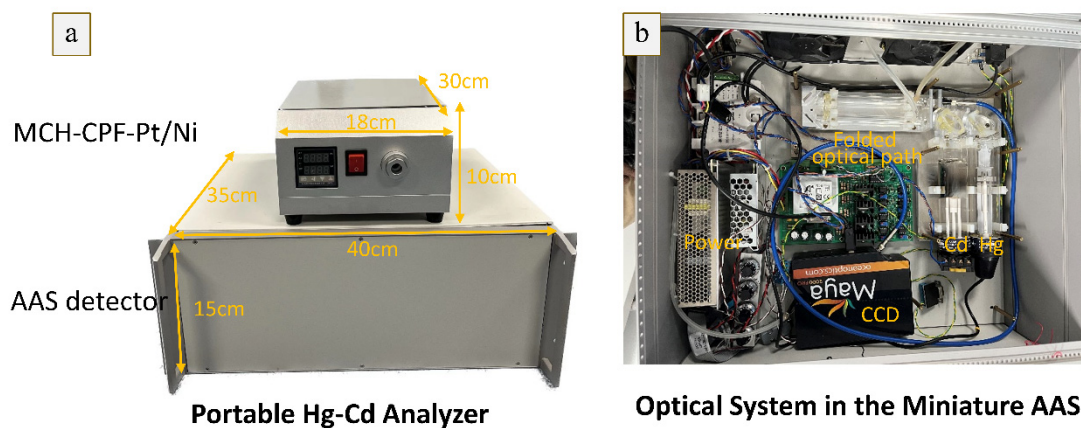

**Figure S1.** The picture of the portable Hg-Cd analyzer and the optical system in miniature AAS. **(Panel a):** the portable Hg-Cd analyzer. **(Panel b):** the miniature AAS. The whole portable Hg-Cd analyzer occupies approximately 14 kg in which the solid sampling module occupies 5 kg, and the AAS module occupies 9 kg; and 270 W are integrated for the total power, in which 30-100 W for MCH-ETV, 100 W for CPF, 140 W for *Pt/Ni* trap, and 30 W for AAS.

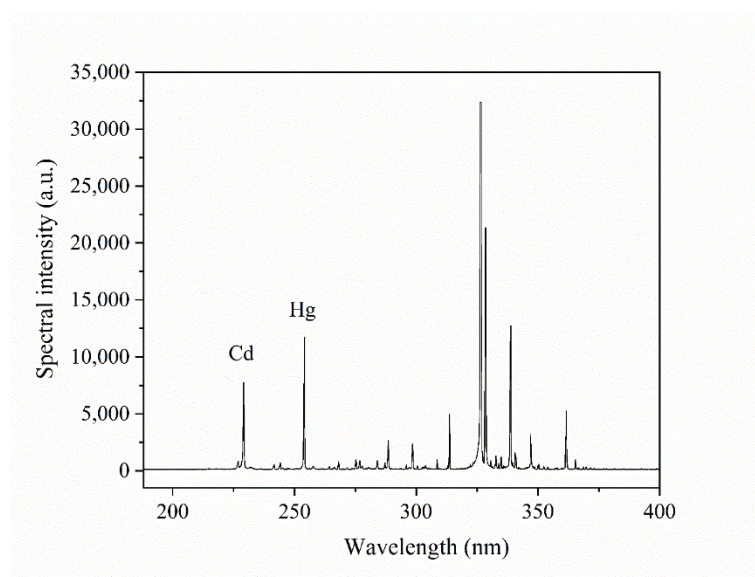

**Figure S2.** The background spectrum intensity of the miniaturized AAS. CCD integration time, 200 ms.

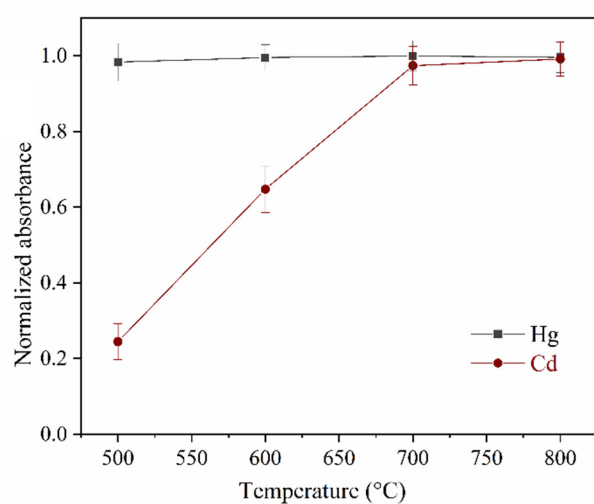

**Figure S3.** Effect of CPF temperature on Hg and Cd signals by MCH-CPF-*Pt/Ni*-AAS (n=3). A 10  $\mu$ L Hg and Cd mixed standard solution ( $500 \mu\text{g L}^{-1}$ ) was introduced, when without the CPF, the Hg and Cd signals were set as 1, and the other signals of Hg and Cd are normalized, respectively.

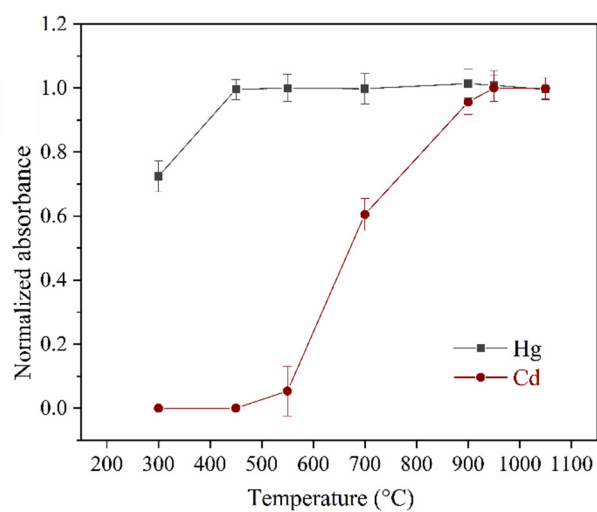

**Figure S4.** Vaporization of Hg and Cd in grain samples by the MCH-CPF-*Pt/Ni*-AAS (n=3). Herein, a 10 mg rice sample (R-03) was introduced into the MCH-CPF-*Pt/Ni*-AAS. The Hg and Cd absorbance are normalized with the signals at 450 °C (30 W) and 950 °C (100 W) set as 1, respectively.

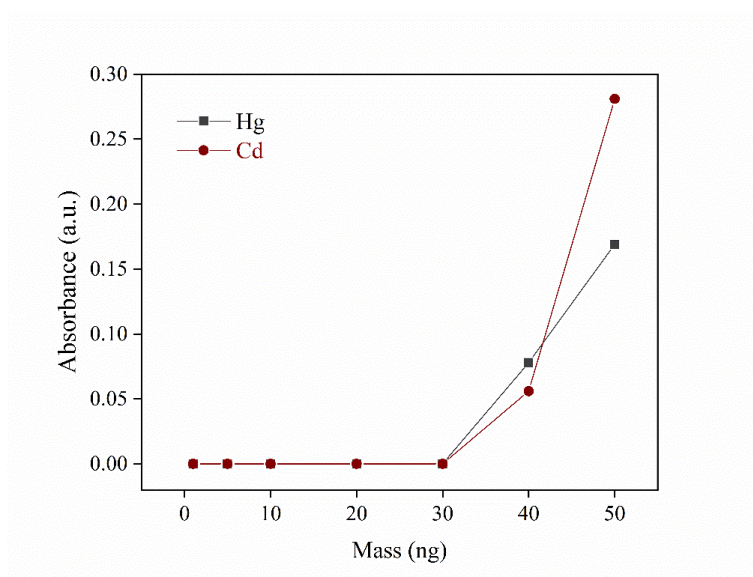

**Figure S5.** Trapping capacity of Hg and Cd using the *Pt/Ni* wafers. A series of mixed Hg and Cd standard solutions ranging from 0 to 5 mg/L (10  $\mu$ L) were introduced into MCH-CPF-*Pt/Ni*-AAS, and the Hg and Cd breakthrough signals with *Pt/Ni* trap were measured.

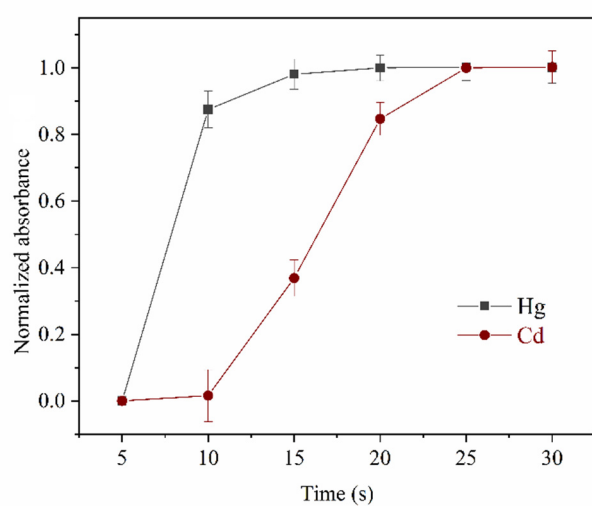

**Figure S6.** The effect of releasing time on Hg and Cd of the *Pt/Ni* trap. A 10 mg R-03 rice sample were introduced into the MCH-CPF-*Pt/Ni*-AAS, and released at 140 W under different *Pt/Ni* trap releasing times (5-30 s). The Hg and Cd absorbances were normalized with signal at 15 s and 25 s set as 1, respectively.

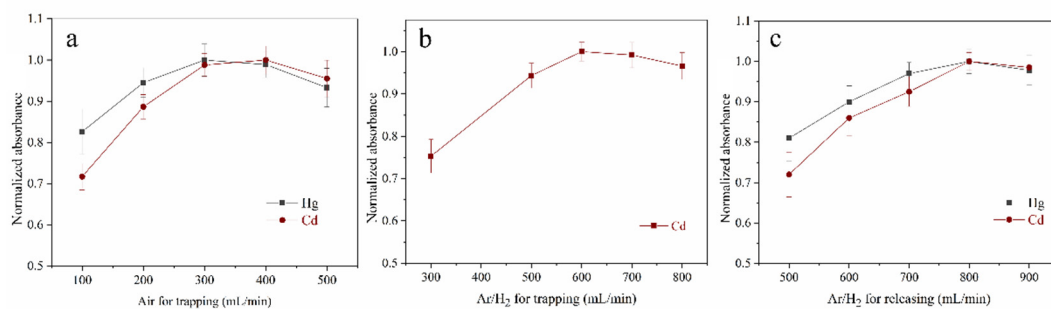

**Figure S7.** The effect of working gases on Hg and Cd detection ( $n = 3$ ). Herein, a 10 mg R-03 rice sample was introduced into the MCH-CPF-*Pt/Ni*-AAS, the black and red lines are for Hg and Cd, respectively. **(Panel a):** The air gas for Hg trapping and rice ashing, and the Hg and Cd intensities are both normalized with the signals at 300 mL/min set as 1, respectively. **(Panel b):** The Ar/H<sub>2</sub> gas for Cd trapping, and Cd intensities are both normalized with the signals at 600 mL/min set as 1, respectively. **(Panel c):** The Ar/H<sub>2</sub> gas for Hg and Cd releasing, the Hg and Cd intensities are both normalized with the signals at 800 mL/min set as 1, respectively.



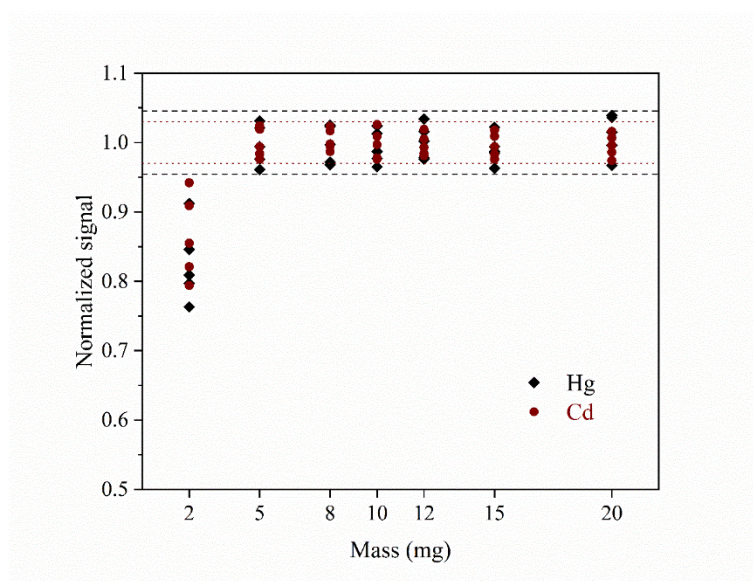

**Figure S8.** The evaluation of grain sample size using the proposed method ( $n = 5$ ). The X-axis is sample mass, Y-axis is the normalized signal of Hg and Cd; and Hg and Cd certified values are normalized with different sample mass (2-20 mg) set as 1. The black and red broken lines are the lower and upper limits in the uncertainty ranges of Hg and Cd, respectively.

**Table S1. Instrumental conditions of the Hg analyzer.**

| Programs        | Temperature (°C) | Hold time (s) | O <sub>2</sub> flow rate (mL/min) |
|-----------------|------------------|---------------|-----------------------------------|
| Drying          | 350              | 1             | 220                               |
| Ashing/trapping | 800              | 70            | 220                               |
| Releasing       | 800              | 45            | 230                               |
| Cooling         | 0                | 10            | 230                               |

**Table S2. Instrumental conditions of microwave digestion ICPMS analysis.**

| ICPMS                          | Parameters                           |
|--------------------------------|--------------------------------------|
| Incident RF power (W)          | 1500                                 |
| Sampling depth (mm)            | 8                                    |
| Scanning mode                  | Peak hopping                         |
| Cooling Ar flow rate (L/min)   | 15                                   |
| Nebulizer Ar flow rate (L/min) | 0.8                                  |
| Auxiliary Ar flow rate (L/min) | 0.4                                  |
| Peristaltic pump (rpm)         | 30                                   |
| Dwell time (ms)                | 30                                   |
| Internal standard isotopes     | <sup>115</sup> In, <sup>209</sup> Bi |
| Isotopes of Hg and Cd          | <sup>202</sup> Hg, <sup>111</sup> Cd |
| CCT-KED                        | He                                   |
| Microwave digestion            | Parameters                           |
| 80 °C                          | 3 min                                |
| 100 °C                         | 3 min                                |
| 130 °C                         | 3 min                                |
| 160 °C                         | 3 min                                |
| 180 °C                         | 35 min                               |
| Cooling                        | 30 min                               |

To validate the method feasibility, 0.1 g grain samples were digested by HNO<sub>3</sub> (3 mL) - H<sub>2</sub>O<sub>2</sub> (2 mL) mixture in PTFE vessels. The vessels were loaded into a microwave system for digestion as shown in Table S1, and then the digests were heated to 80°C to remove acid until <1 mL residue remained, subsequently accurately diluted to 25 mL with purified water for ICPMS detection.

**Table S3. The interference of potential elements (n=3).**

| Interference materials | Added <sup>a</sup><br>( $\mu\text{g}$ ) | Recoveries (%) <sup>b</sup> |     |
|------------------------|-----------------------------------------|-----------------------------|-----|
|                        |                                         | Hg                          | Cd  |
| As                     | 0.2                                     | 91                          | 109 |
| Pb                     | 0.2                                     | 111                         | 107 |
| Zn                     | 0.5                                     | 112                         | 100 |
| Cr                     | 0.5                                     | 96                          | 98  |
| Mn                     | 1                                       | 99                          | 94  |
| Ni                     | 1                                       | 115                         | 92  |
| Fe                     | 5                                       | 101                         | 103 |
| Cu                     | 10                                      | 89                          | 101 |
| Mg                     | 50                                      | 107                         | 96  |
| Ca                     | 50                                      | 109                         | 102 |
| Al                     | 50                                      | 104                         | 107 |

<sup>a</sup> A series of rice sample (10 mg) containing interfering element (10  $\mu\text{L}$ ) with added levels mentioned above were measured by the proposed method.

<sup>b</sup> The recoveries are the ratio of measured Hg and Cd levels mixed with spiking elements by the proposed method to rice sample without spiking elements (n=3).
